# Supplementary figures and images for: Simultaneous determination of cyanide and thiocyanate in swine plasma by high-performance liquid chromatography with fluorescence detection based on a novel D–π–A carbazole-based turn-on fluorescence labeling reagent
Source: Royal Society of Chemistry journal article supplement (doi:10.1039/c9ay00784a), 2019-01-01

### Supporting Information

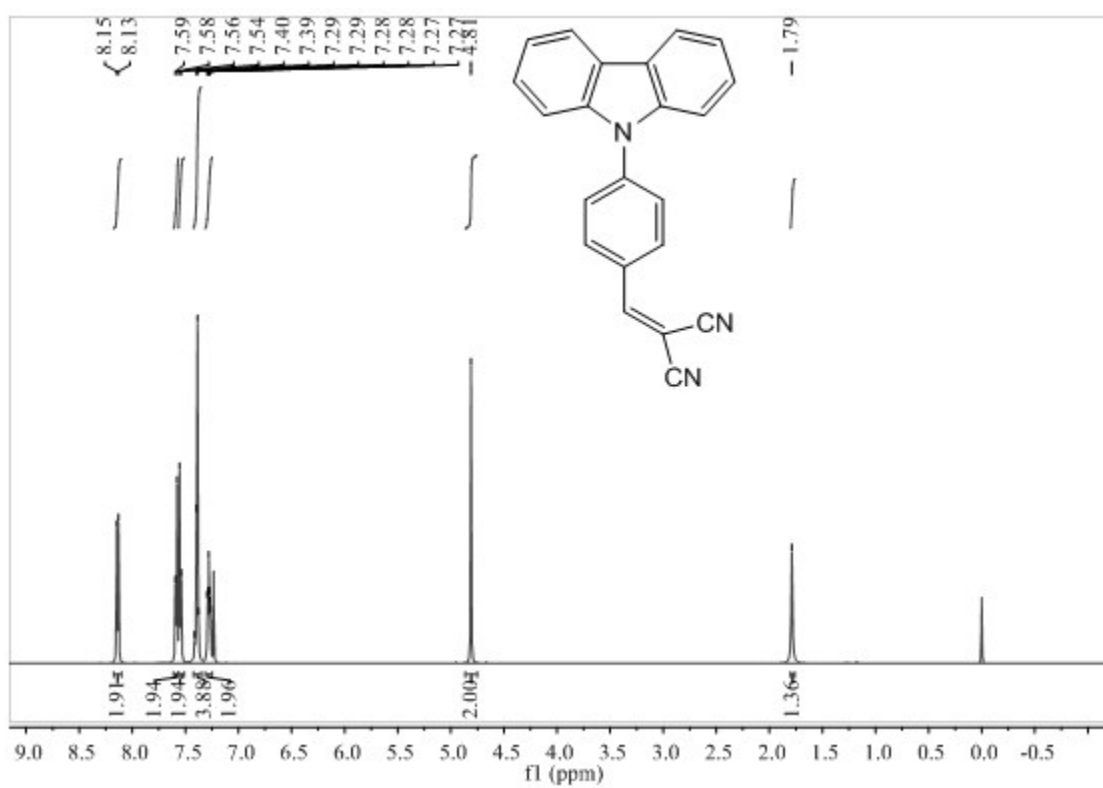

**Fig. S1**  $^1\text{H}$  NMR of CBM.

Supplement: c9ay00784a1.pdf [file c9ay00784a1.pdf]
